# Supplementary material for: Paramedic Willingness to Report Violence Following the Introduction of a Novel, Point-of-Event Reporting Process in a Single Canadian Paramedic Service
Source: MDPI journal article supplement (doi:10.3390/ijerph21030363), 2024-03-19
Supplement: s1 [file s1]

Have you experienced violence from a member of the public since the launch of the EVIR in February 2021?

Yes

No

On How Many Occasions?  
(Free Text)

Eval Questions &  
Demographics  
(see Page 2)

Did you report the incident(s)?

Yes

Sometimes

No

What influenced your decision to  
report?  
(Free Text)

What were your **positive**  
experiences with the reporting  
process?  
(Free Text)

What were your **negative**  
experiences with the reporting  
process?  
(Free Text)

Generally speaking, did your  
experiences with reporting...

Encourage you to report  
similar incidents in the  
future?

Discourage you from  
reporting similar incidents in  
the future?

Why?  
(Free Text)

Why not?  
(Free Text)

What could we  
do to change  
your mind?  
(Free Text)

Eval Questions & Demographics  
(Page 2)

(From Page 1)

How **valuable** do you feel the following EVAP initiatives are in promoting an organizational culture within PRPS where paramedics feel **safe, supported**, and **empowered** in rejecting violence as just ‘part of the job’?

| EVAP Initiative                                               | 1 – Not at all Valuable | 2 | 3 | 4 | 5 – Extremely Valuable | I Can’t Say |
|---------------------------------------------------------------|-------------------------|---|---|---|------------------------|-------------|
| Spit Hoods                                                    |                         |   |   |   |                        |             |
| Soft Restraints                                               |                         |   |   |   |                        |             |
| Zero Tolerance Stickers in Ambulances                         |                         |   |   |   |                        |             |
| SOP HS-19: Zero Tolerance for Violence from the Public Policy |                         |   |   |   |                        |             |
| The External Violence Incident Report (EVIR)                  |                         |   |   |   |                        |             |
| Address Hazard Flags Resulting from EVIRs                     |                         |   |   |   |                        |             |
| Phase 1 of the Public Awareness Campaign                      |                         |   |   |   |                        |             |

(**Optionally**) Please use this space to provide us with any comments about the EVAP initiatives listed above. ([Free Text](#))

What is your gender? (Man/Woman/Gender Diverse Person/Prefer Not to Say)

What is your current employment classification? (Part-Time / Full-Time [Including Temporary Full-Time Contract])

What is your current certification level? (PCP / ACP)

Are you in leadership / supervisory role? (Acting Superintendent / Superintendent / No)

For how many years have you been working as a paramedic (in total, across all paramedic services)? ([Free Text](#))

Thank you for participating in this survey. Your feedback is important to the success of the EVAP program and helps keep paramedics in Peel Region safe.

For first responder-specific mental health support, including self-assessment tools and information on finding a mental health provider, please visit: [www.pspmentalhealth.ca](http://www.pspmentalhealth.ca)

For questions about this survey, please email [justin.mausz@peelregion.ca](mailto:justin.mausz@peelregion.ca)
