# Supplementary figures and images for: Paramedic Willingness to Report Violence Following the Introduction of a Novel, Point-of-Event Reporting Process in a Single Canadian Paramedic Service
Source: MDPI journal article supplement (doi:10.3390/ijerph21030363), 2024-03-19

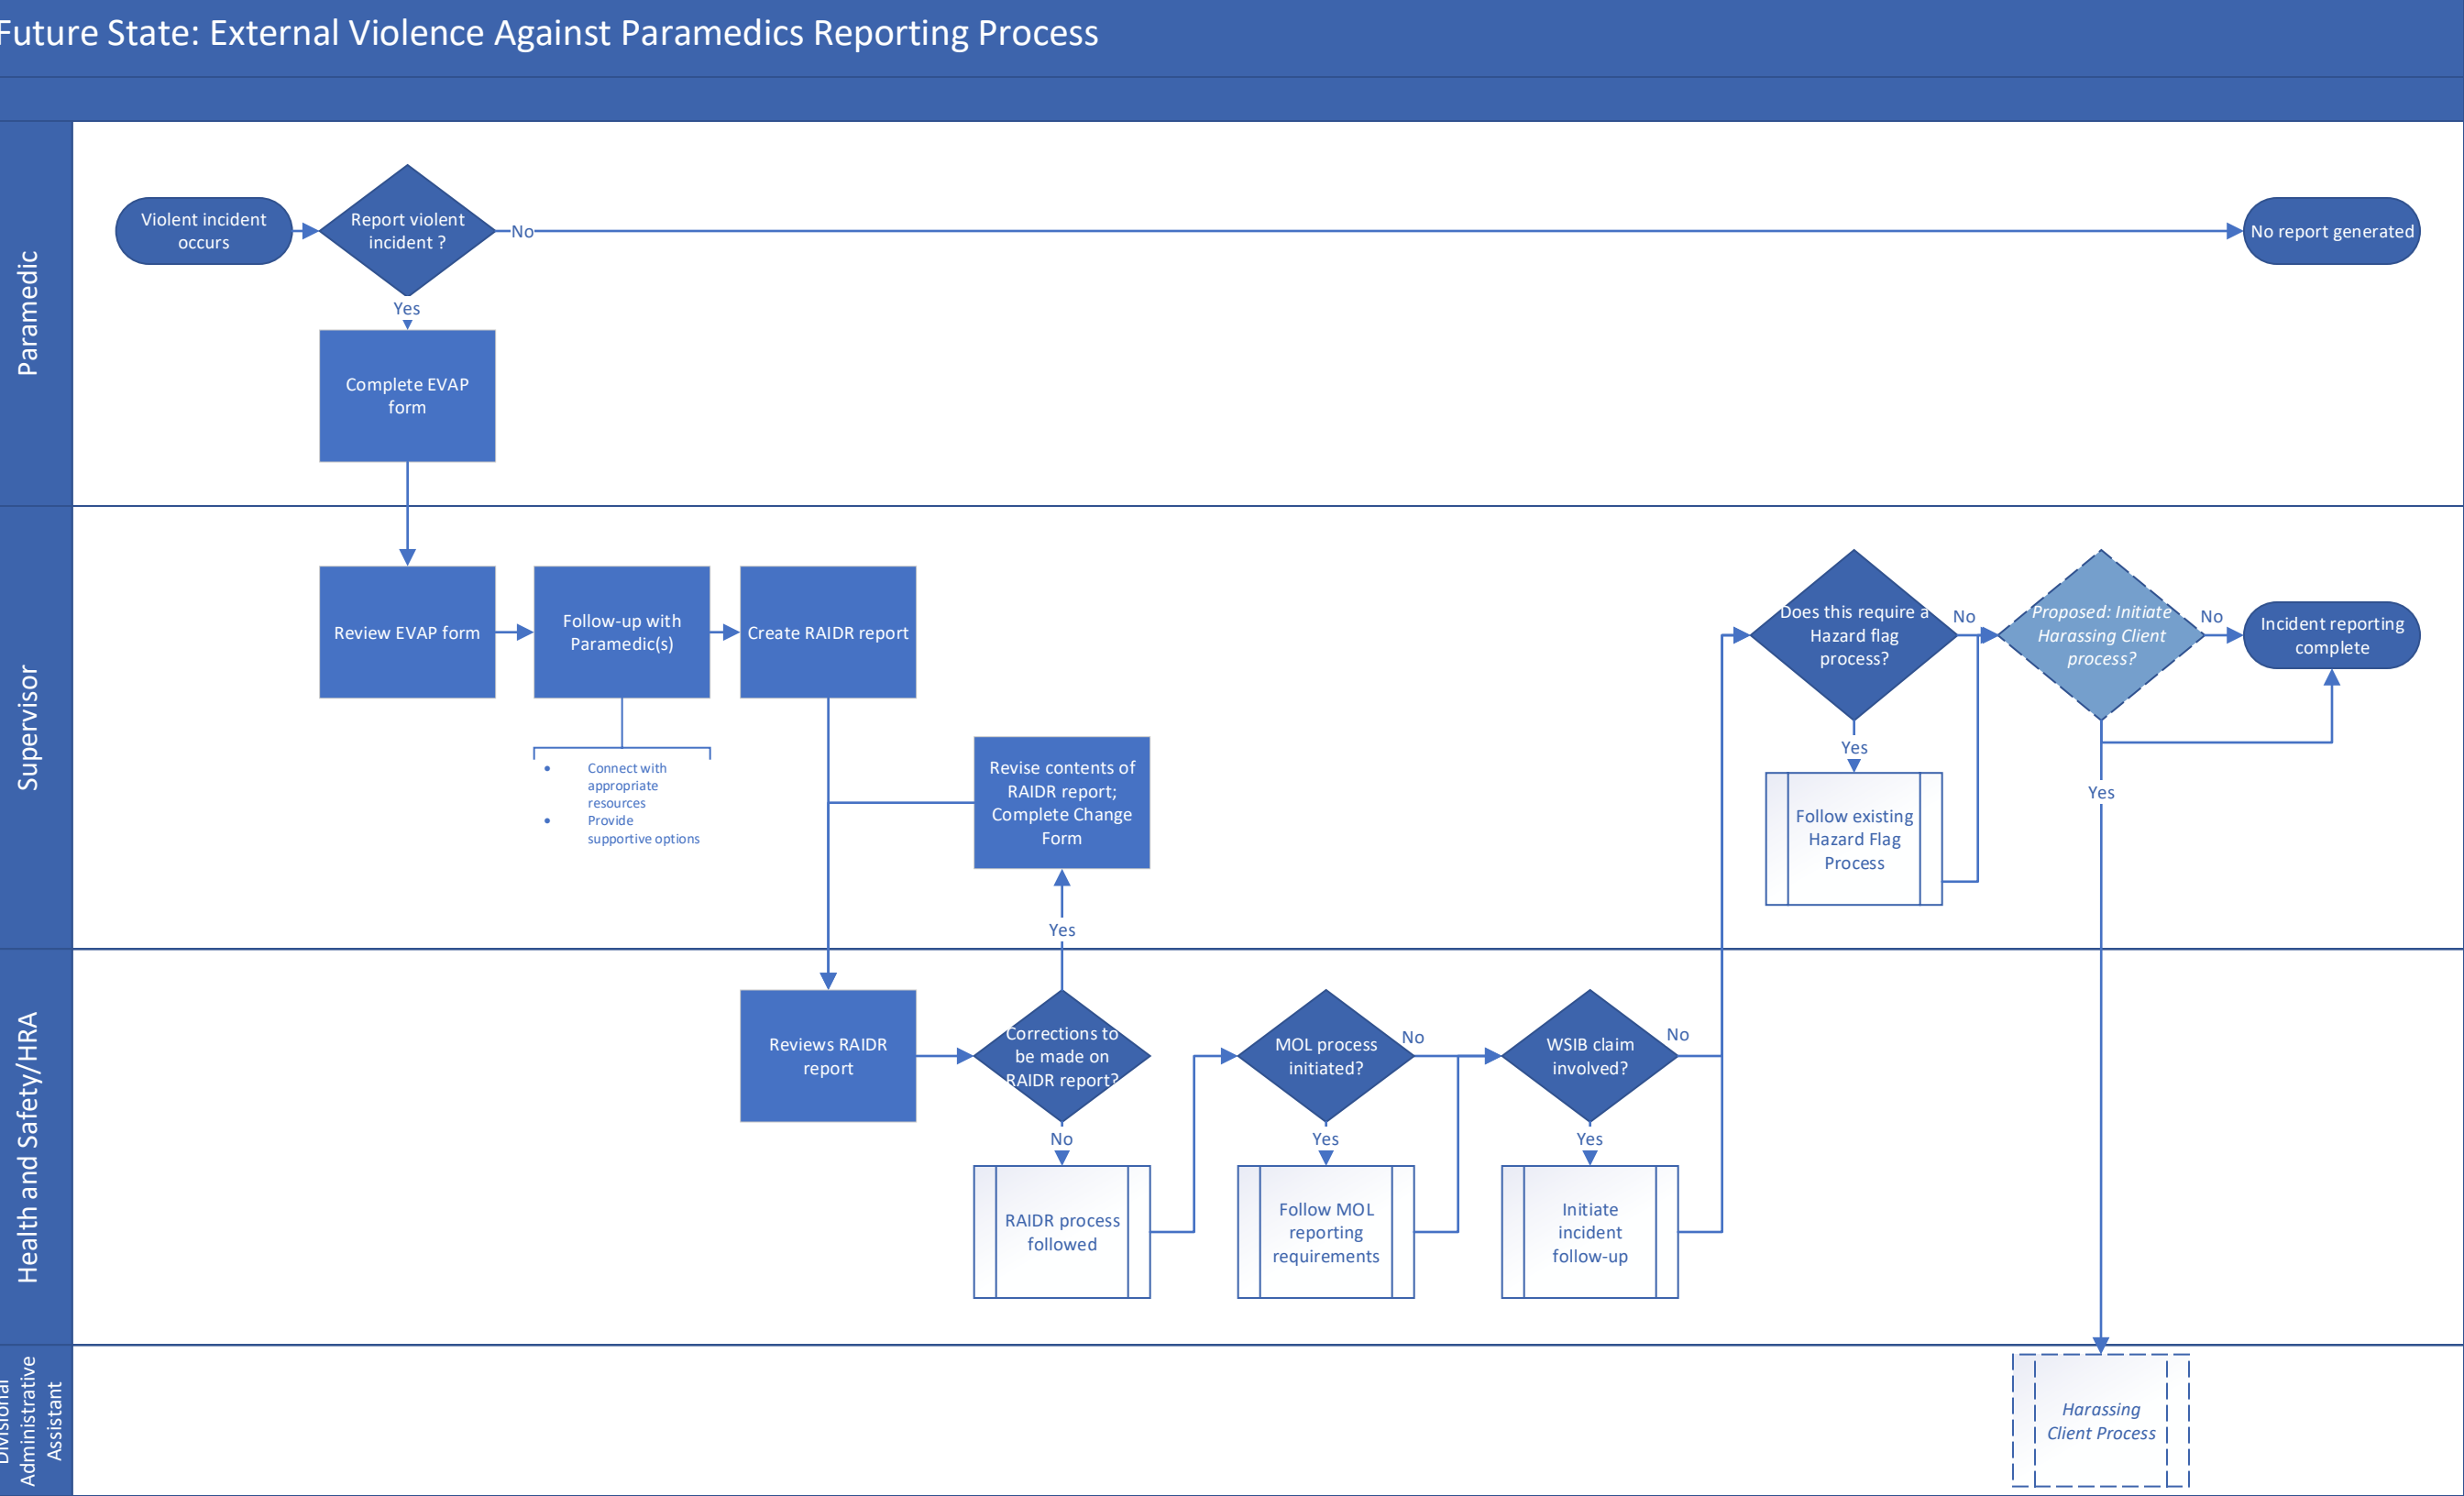

Supplement: s1 [file s1]
